# Supplementary material for: Relationships Between Chemical Structure and Antioxidant Activity of Isolated Phytocompounds from Lemon Verbena
Source: PubMed Central journal article supplement (PMC6719922; doi:10.3390/antiox8080324), 2019-08-20
Supplement: antioxidants-08-00324-s001.pdf [file antioxidants-08-00324-s001.pdf]

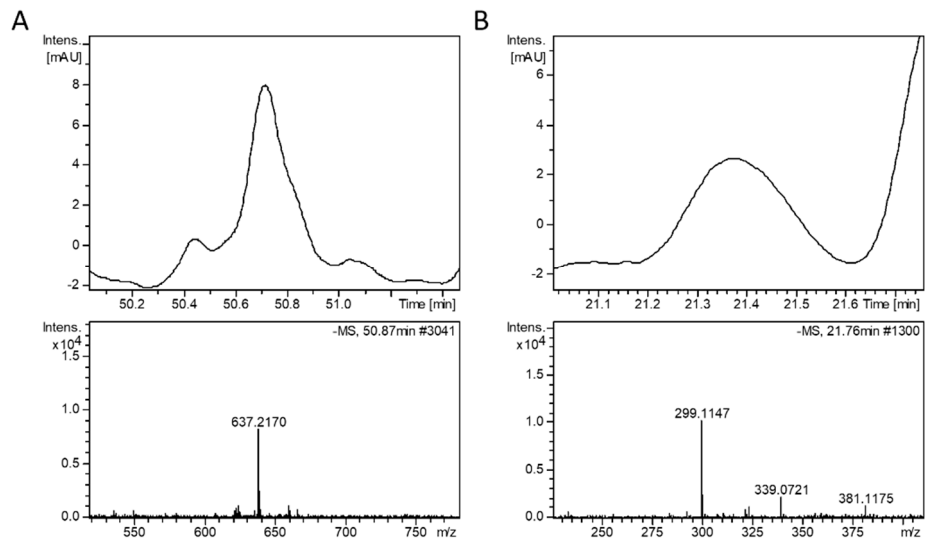

**Figure S1.** UV chromatograms at 280 nm and MS spectra for (A) peak 5 and (B) peak 28.

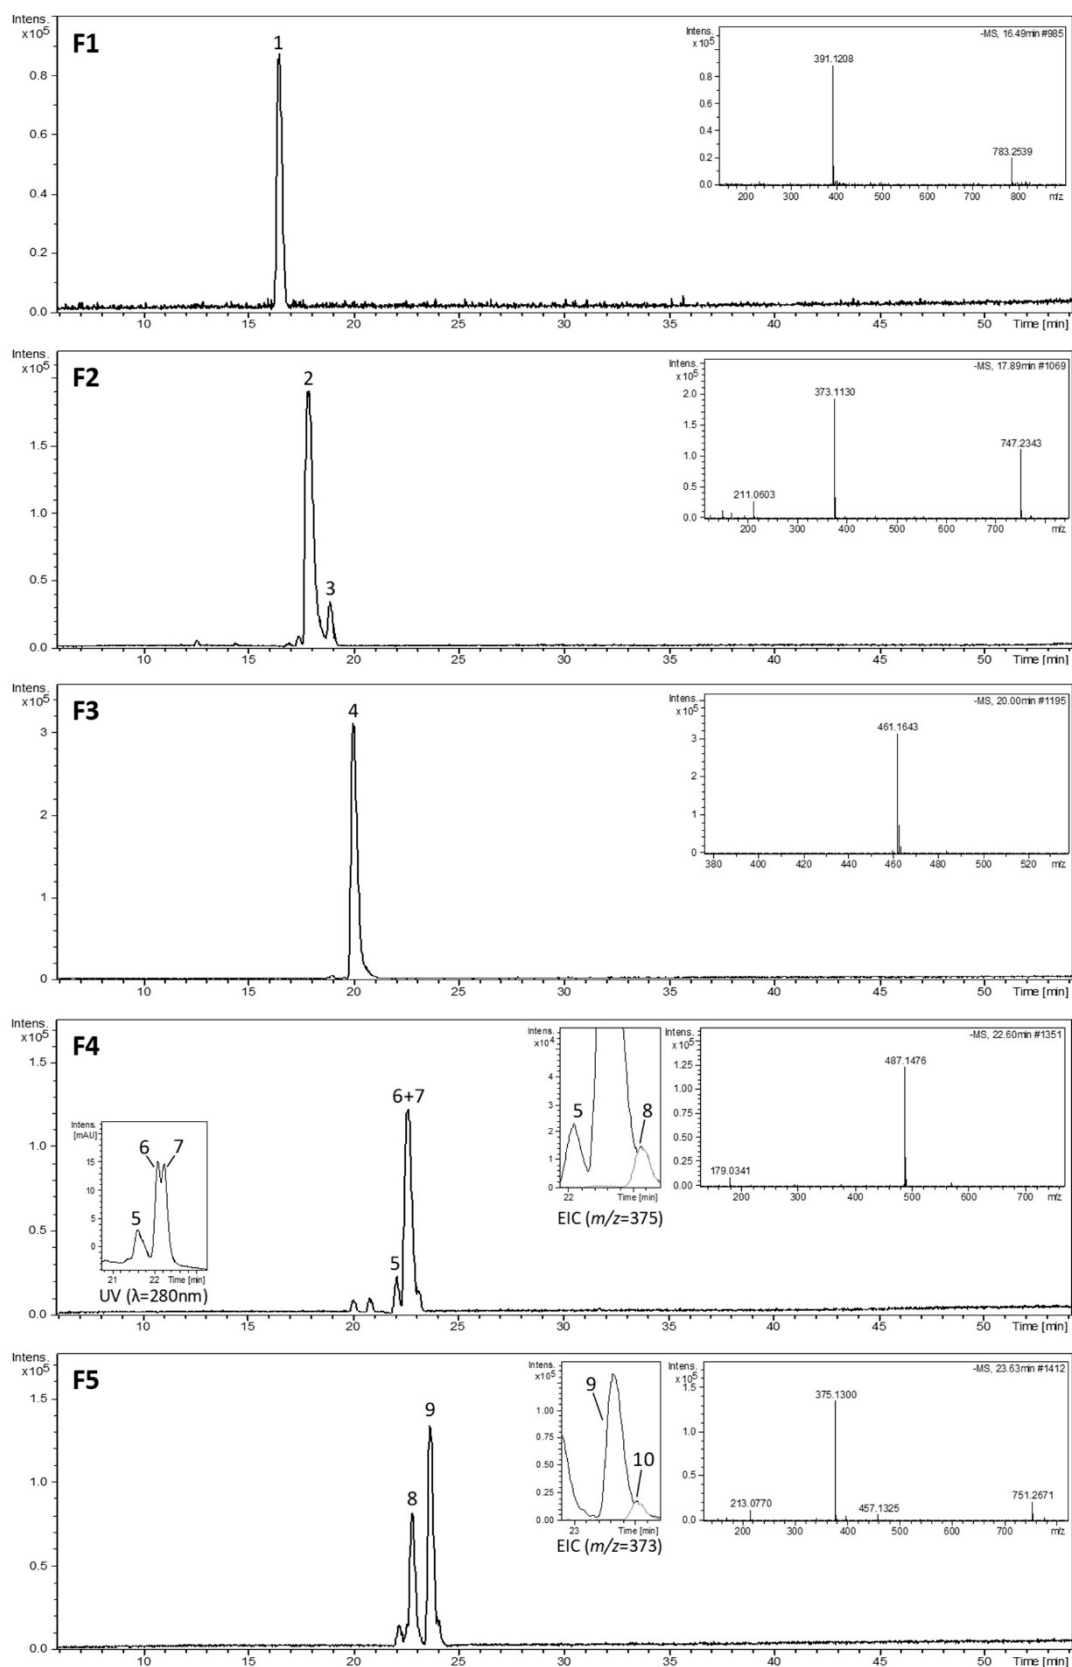

**Figure S2.** Base peak chromatograms of the collected fractions from a commercial lemon verbena extract (PLX®10) and MS spectra of their major compound, including the peak numbers of Table 1. UV/EIC chromatograms were added in those cases where they were considered necessary.

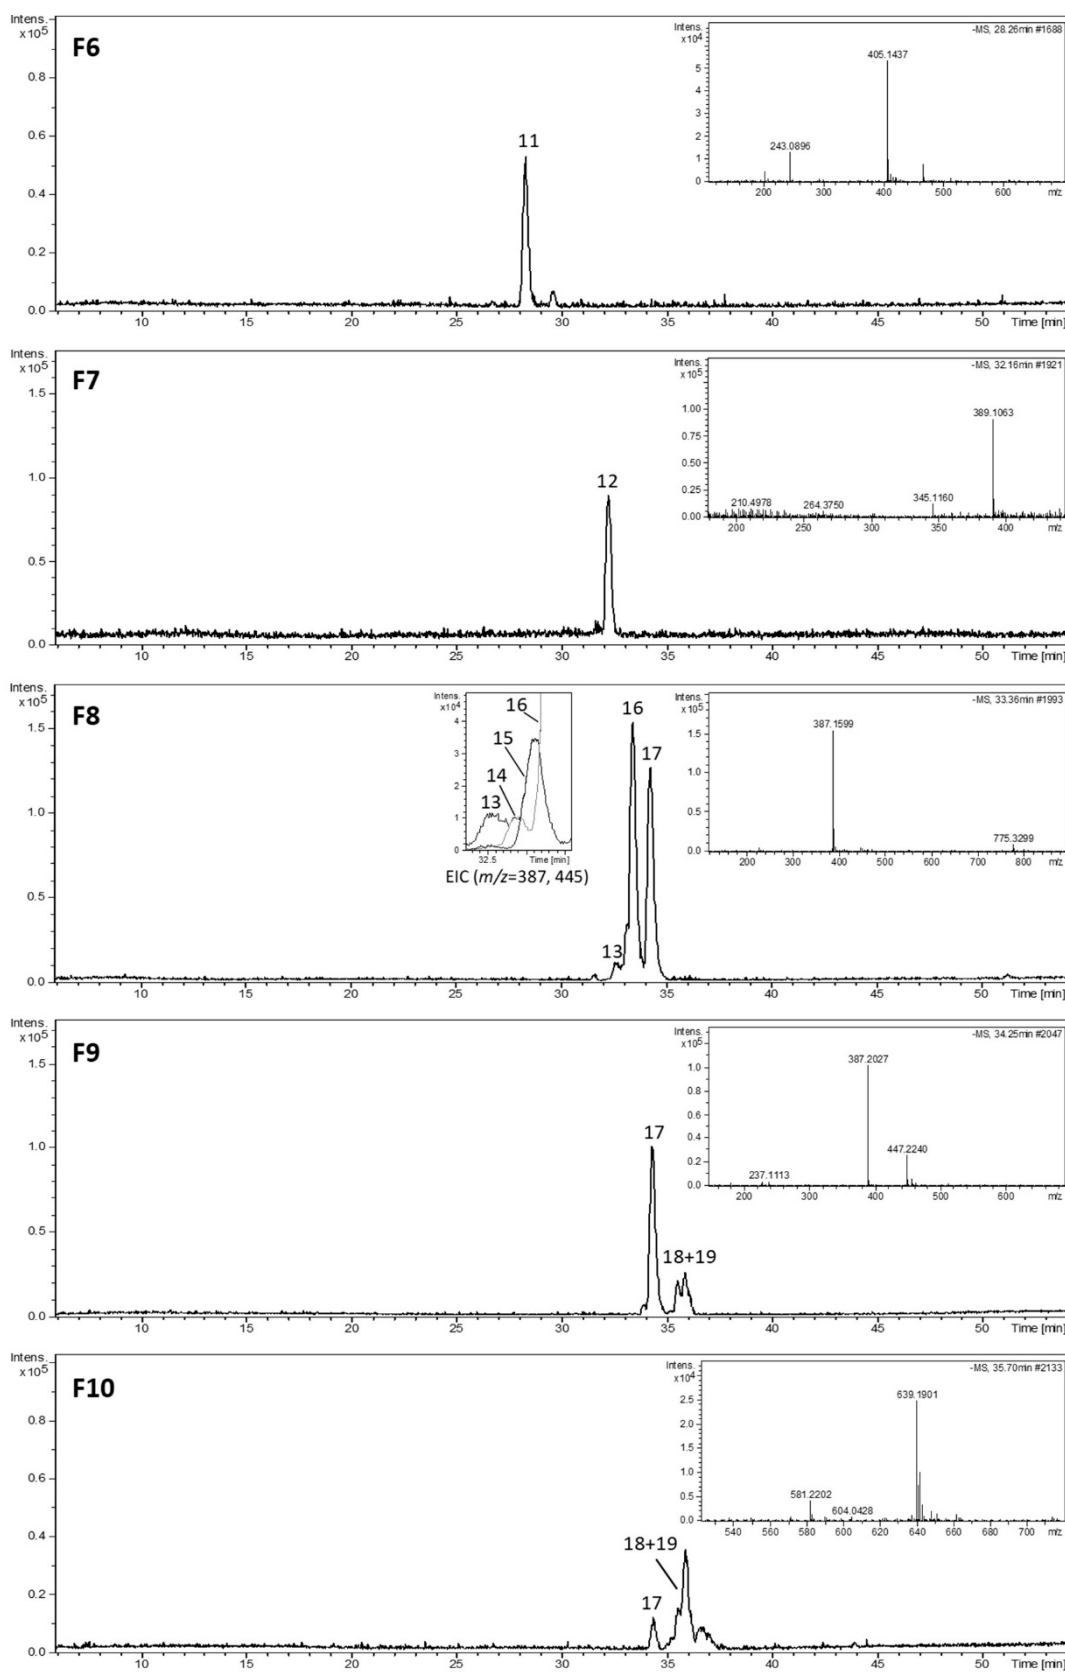

**Figure S2.** Base peak chromatograms of the collected fractions from a commercial lemon verbena extract (PLX®10) and MS spectra of their major compound, including the peak numbers of Table 1. UV/EIC chromatograms were added in those cases where they were considered necessary (*Continued*).

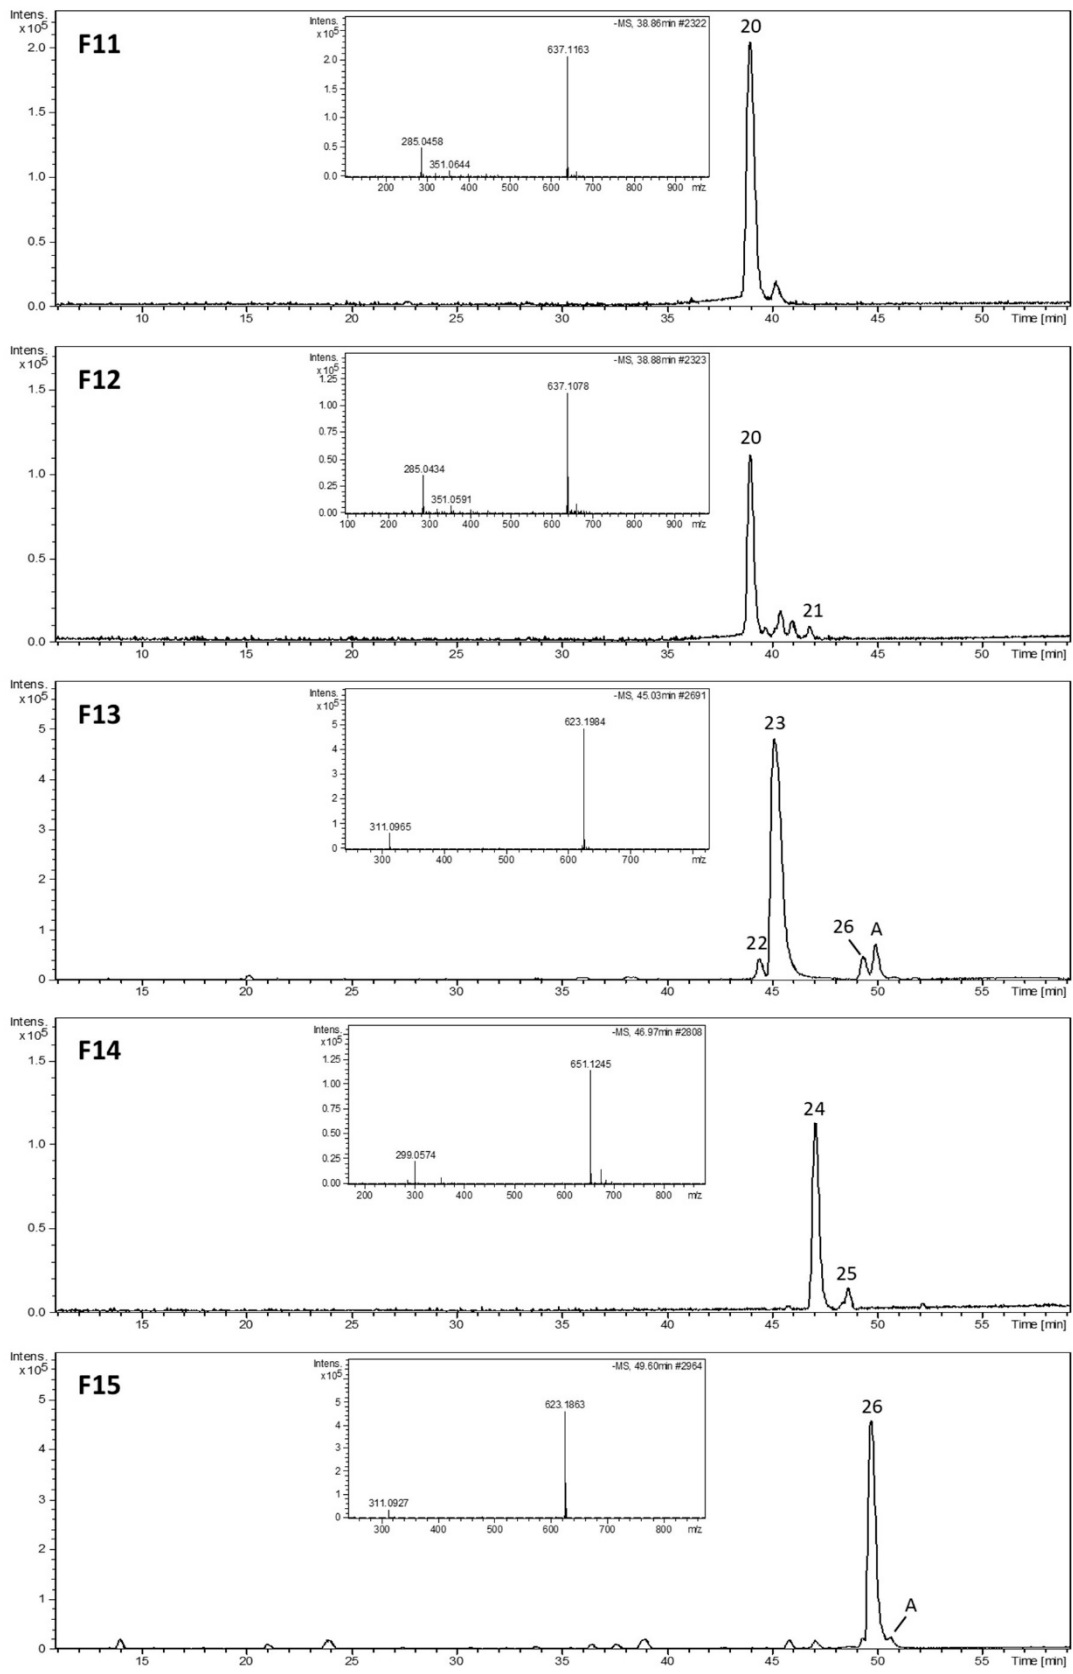

**Figure S2.** Base peak chromatograms of the collected fractions from a commercial lemon verbena extract (PLX®10) and MS spectra of their major compound, including the peak numbers of Table 1. UV/EIC chromatograms were add in those cases where they were considered necessary (*Continued*).

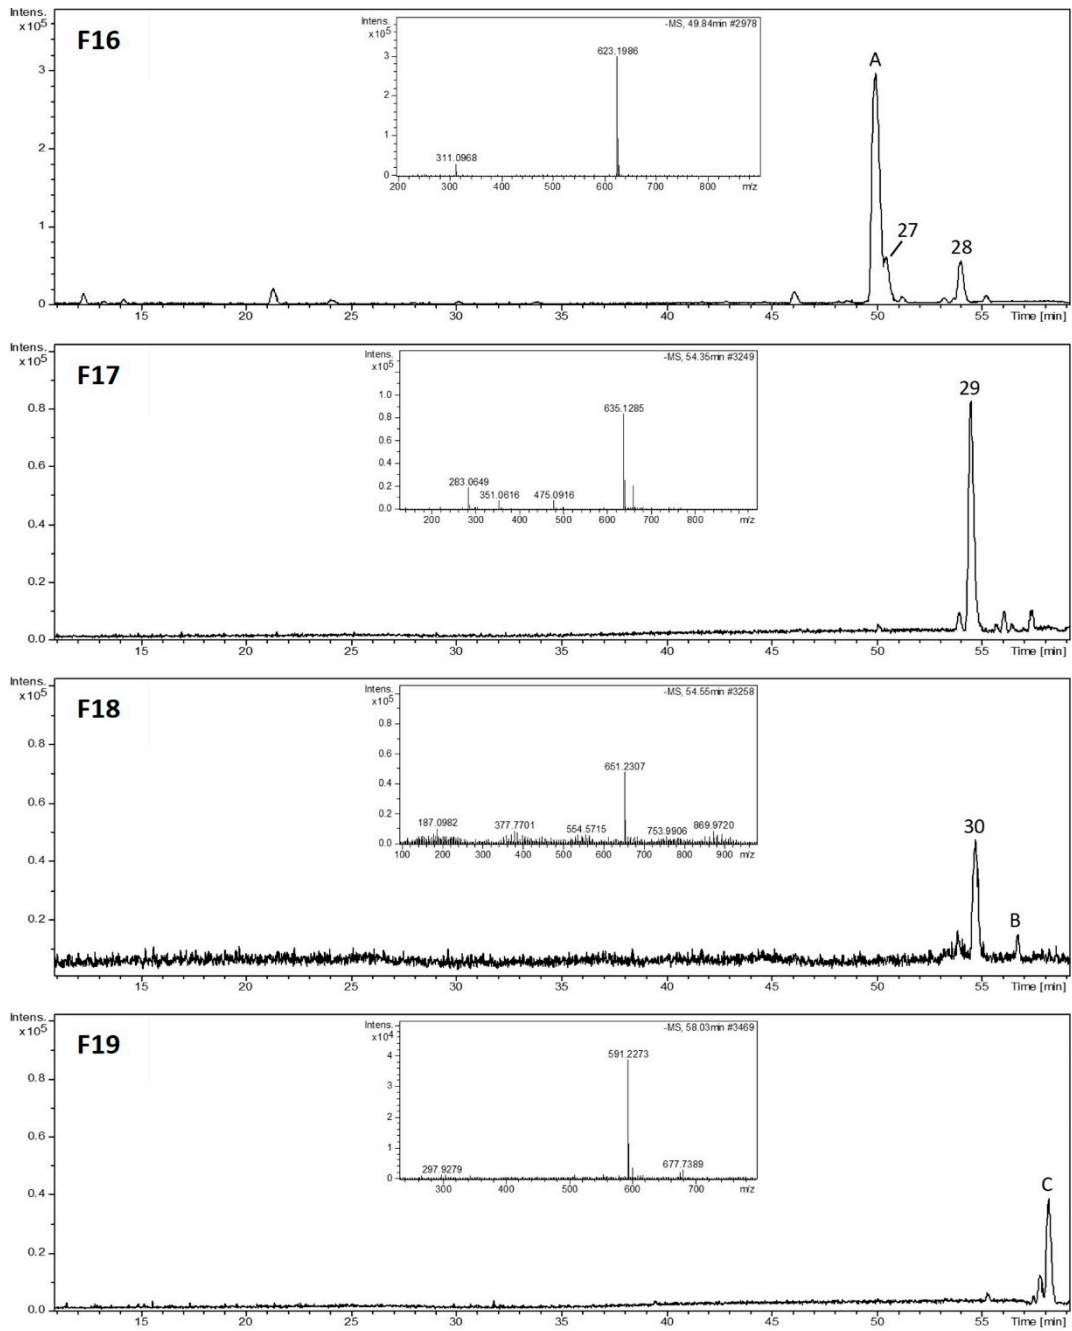

**Figure S2.** Base peak chromatograms of the collected fractions from a commercial lemon verbena extract (PLX®10) and MS spectra of their major compound, including the peak numbers of Table 1. UV/EIC chromatograms were add in those cases where they were considered necessary (*Continued*).

**Table S1.** In vitro antioxidant activity by FRAP, TEAC, and ORAC assays for the commercial lemon verbena extract (PLX®10) and its collected fractions, expressed as the mean of three independent replicates  $\pm$  the standard deviation. <sup>a</sup> mmoles equivalents of Fe<sup>2+</sup>/g (dry weight), <sup>b</sup> mmoles equivalents of Trolox/g (dw).

| Sample        | FRAP <sup>a</sup> | TEAC <sup>b</sup> | ORAC <sup>b</sup> |
|---------------|-------------------|-------------------|-------------------|
| <b>PLX®10</b> | 0.676 $\pm$ 0.002 | 0.35 $\pm$ 0.03   | 1.2 $\pm$ 0.1     |
| <b>F1</b>     | 0.009 $\pm$ 0.001 | 0.008 $\pm$ 0.001 | 0.051 $\pm$ 0.008 |
| <b>F2</b>     | 0.045 $\pm$ 0.003 | 0.035 $\pm$ 0.001 | 0.174 $\pm$ 0.006 |
| <b>F3</b>     | 0.270 $\pm$ 0.001 | 0.182 $\pm$ 0.004 | 0.99 $\pm$ 0.01   |
| <b>F4</b>     | 0.122 $\pm$ 0.003 | 0.082 $\pm$ 0.001 | 0.30 $\pm$ 0.01   |
| <b>F5</b>     | 0.068 $\pm$ 0.002 | 0.043 $\pm$ 0.003 | 0.19 $\pm$ 0.02   |
| <b>F6</b>     | 0.074 $\pm$ 0.003 | 0.041 $\pm$ 0.009 | 0.223 $\pm$ 0.009 |
| <b>F7</b>     | 0.048 $\pm$ 0.001 | 0.033 $\pm$ 0.003 | 0.131 $\pm$ 0.004 |
| <b>F8</b>     | 0.137 $\pm$ 0.007 | 0.077 $\pm$ 0.007 | 0.23 $\pm$ 0.01   |
| <b>F9</b>     | 0.192 $\pm$ 0.007 | 0.111 $\pm$ 0.002 | 0.290 $\pm$ 0.007 |
| <b>F10</b>    | 0.27 $\pm$ 0.01   | 0.16 $\pm$ 0.01   | 0.55 $\pm$ 0.06   |
| <b>F11</b>    | 0.58 $\pm$ 0.02   | 0.246 $\pm$ 0.003 | 1.2 $\pm$ 0.1     |
| <b>F12</b>    | 0.51 $\pm$ 0.02   | 0.290 $\pm$ 0.001 | 1.74 $\pm$ 0.09   |
| <b>F13</b>    | 1.9 $\pm$ 0.1     | 0.84 $\pm$ 0.04   | 3.2 $\pm$ 0.3     |
| <b>F14</b>    | 0.084 $\pm$ 0.007 | 0.057 $\pm$ 0.006 | 1.05 $\pm$ 0.01   |
| <b>F15</b>    | 1.57 $\pm$ 0.09   | 0.72 $\pm$ 0.04   | 1.5 $\pm$ 0.1     |
| <b>F16</b>    | 0.83 $\pm$ 0.07   | 0.37 $\pm$ 0.02   | 0.68 $\pm$ 0.01   |
| <b>F17</b>    | 0.120 $\pm$ 0.005 | 0.077 $\pm$ 0.006 | 0.169 $\pm$ 0.002 |
| <b>F18</b>    | 0.179 $\pm$ 0.005 | 0.101 $\pm$ 0.02  | 0.23 $\pm$ 0.03   |
| <b>F19</b>    | 0.091 $\pm$ 0.007 | 0.050 $\pm$ 0.005 | 0.12 $\pm$ 0.02   |
